# Supplementary material for: Synthesis and Crystal Structure Analysis of Some Aromatic Imines of Syringaldehyde
Source: MDPI journal article supplement (doi:10.3390/cryst14010099), 2024-01-22

# Agilent Resolutions Pro

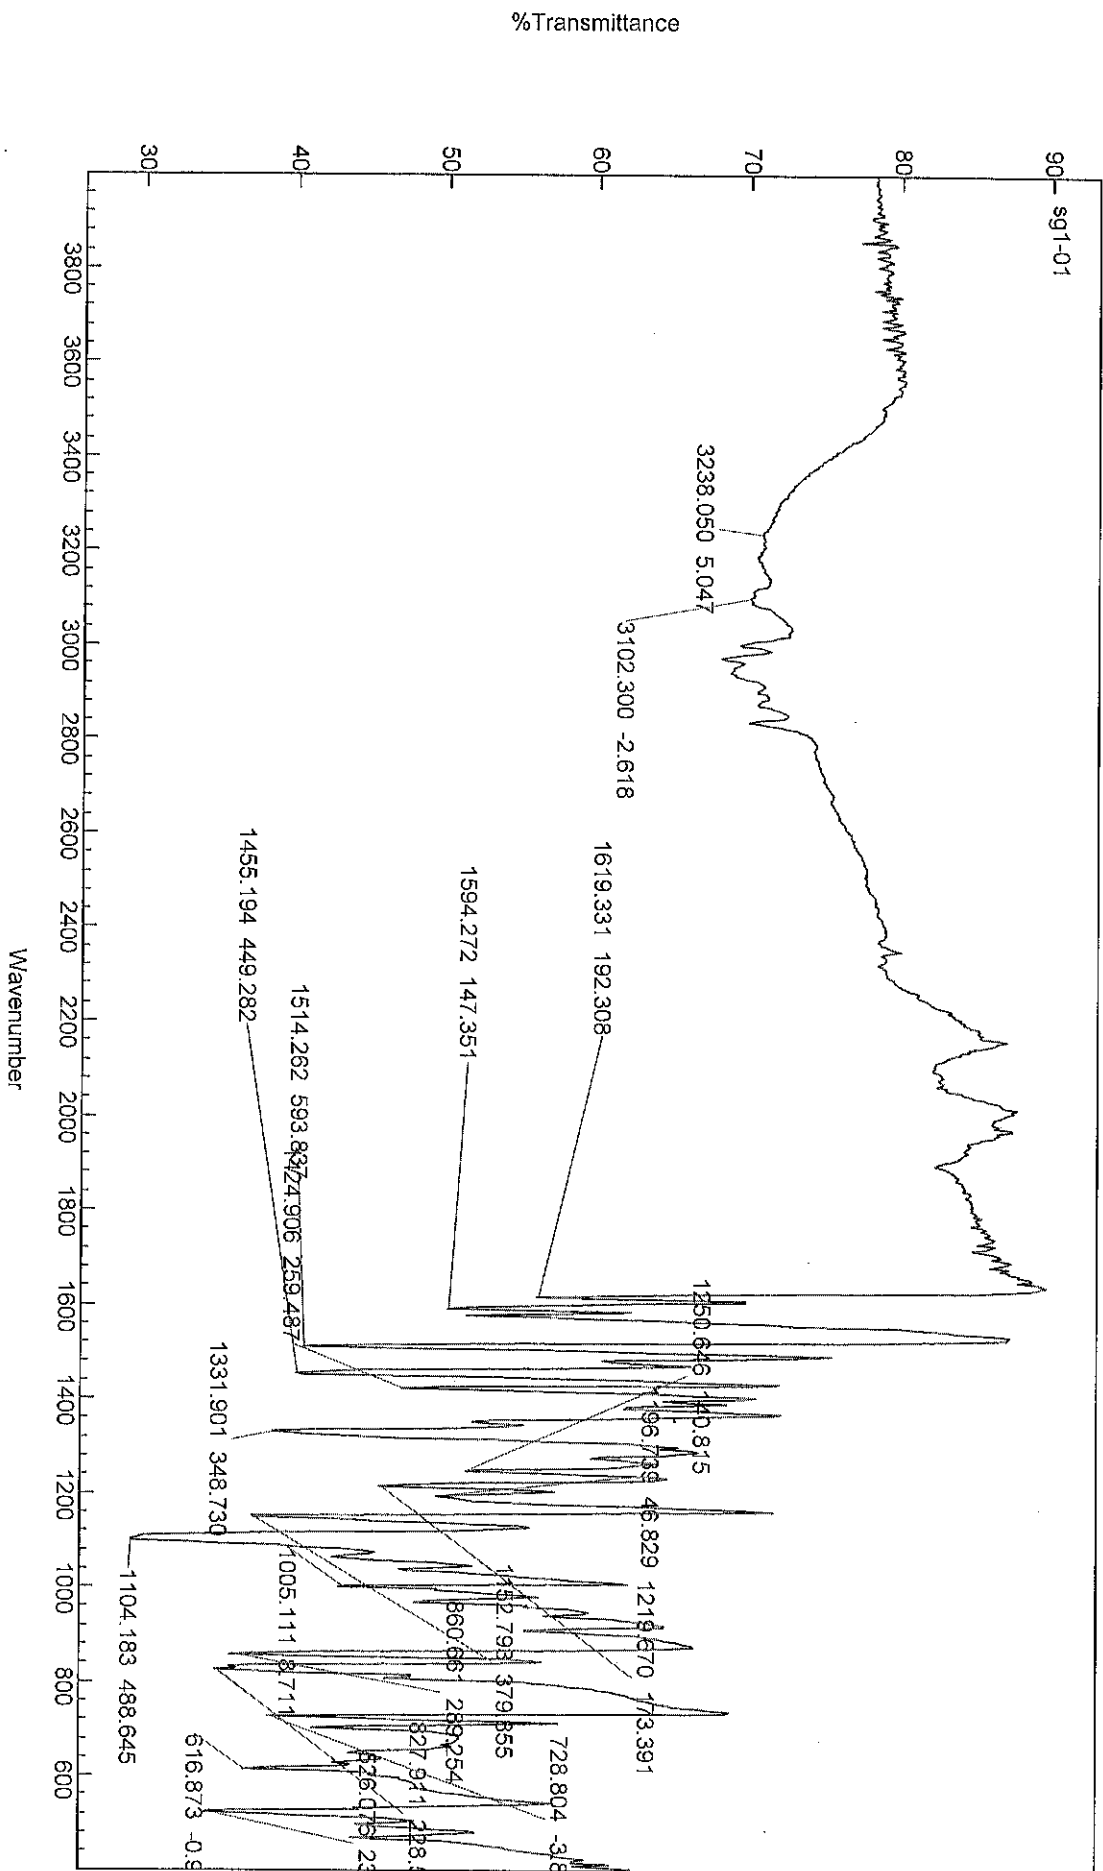

| Name   |
|--------|
| sg1-01 |

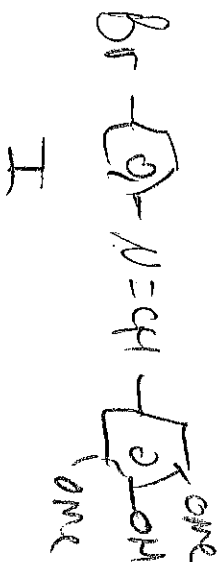

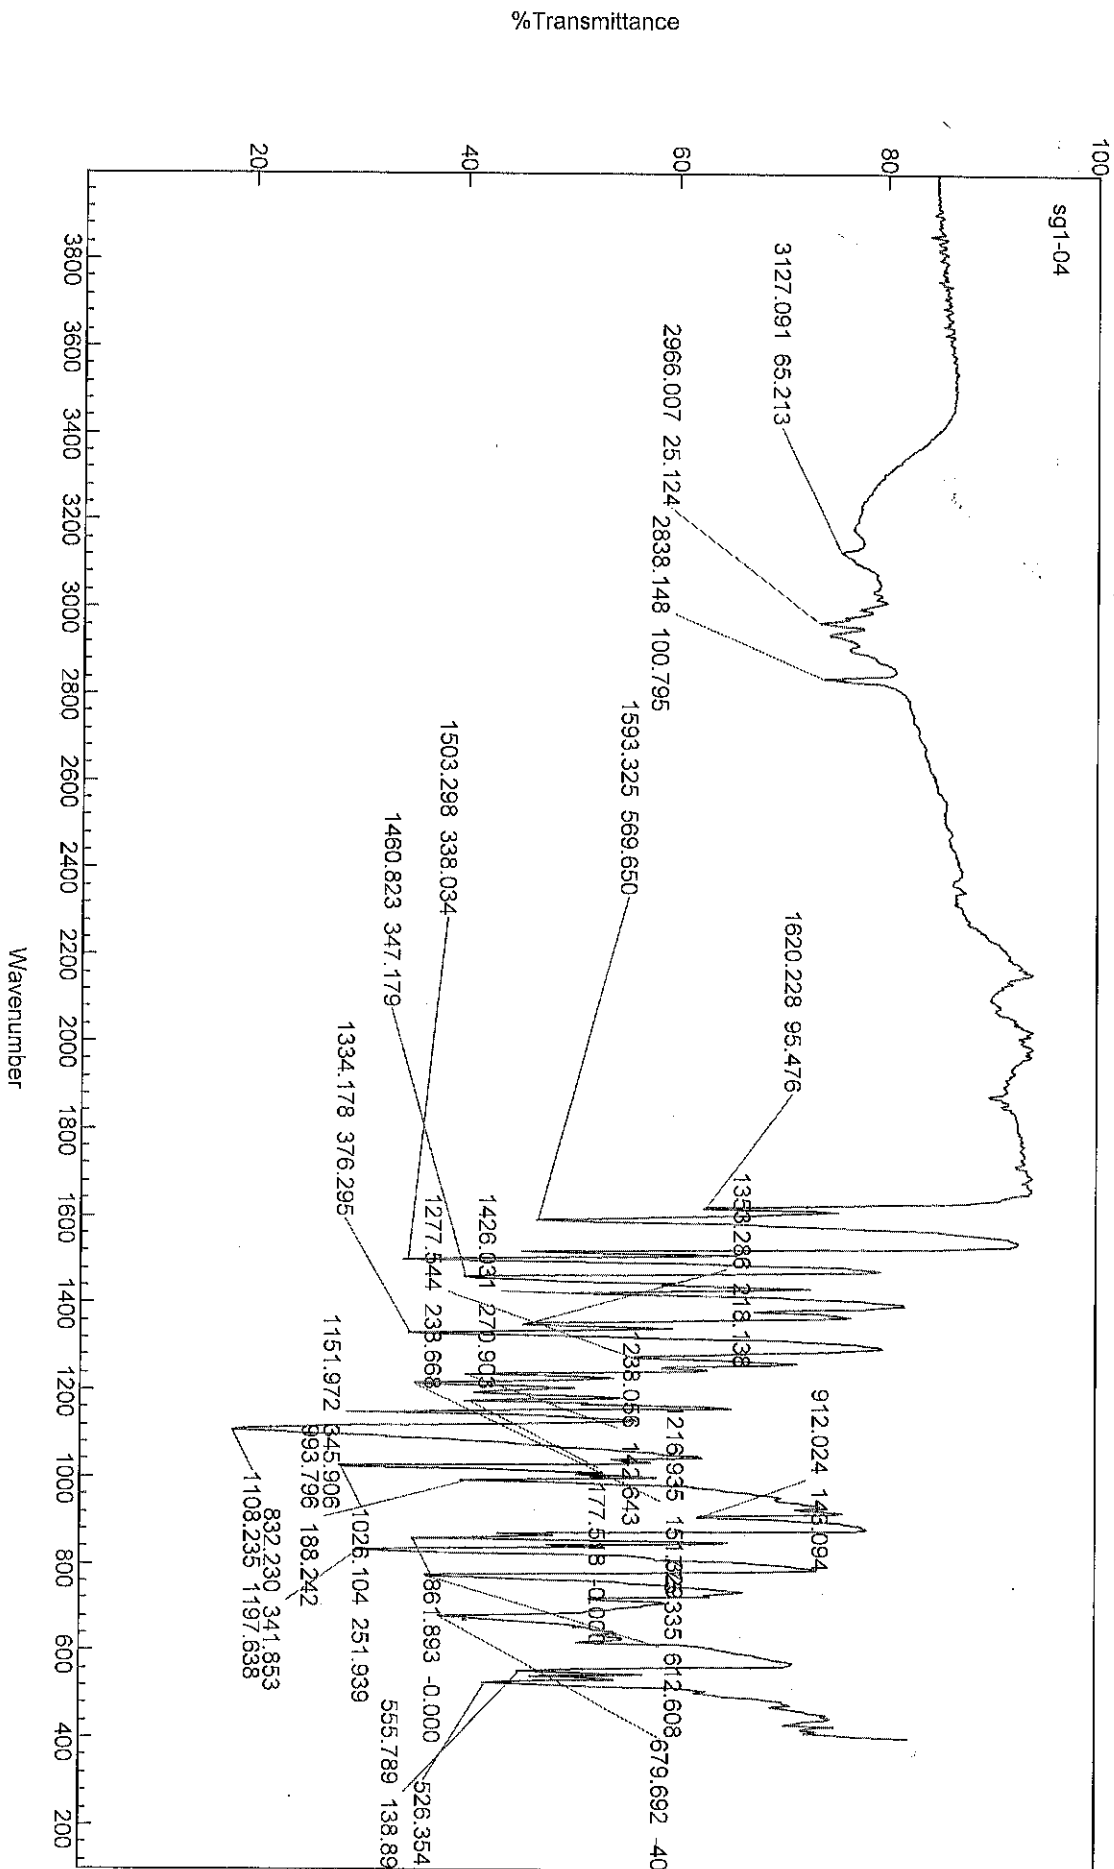

|        |  |
|--------|--|
| Name   |  |
| sg1-04 |  |

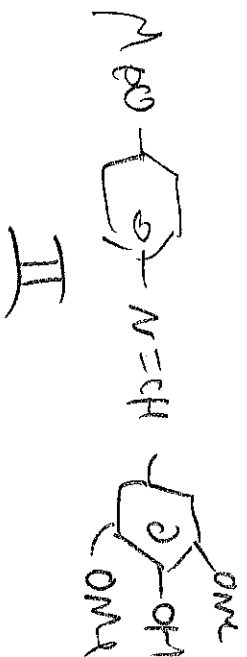

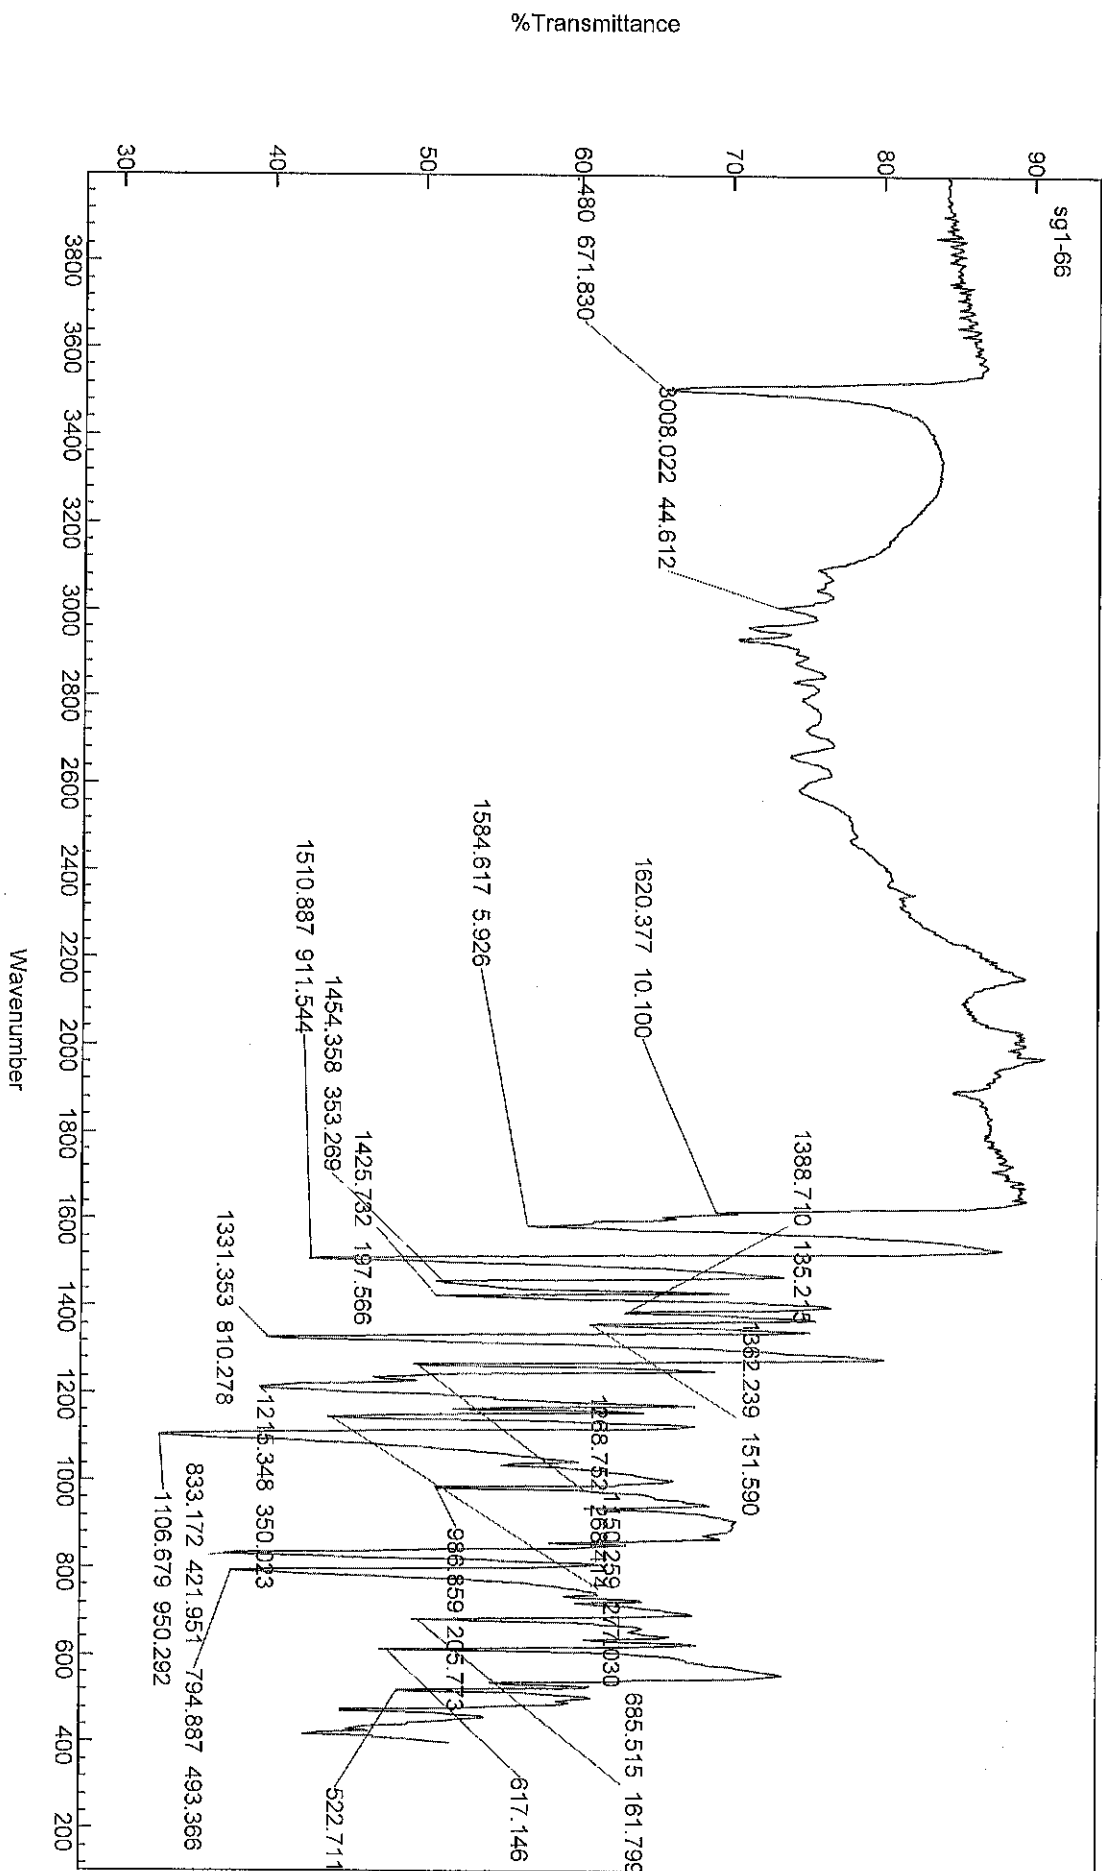

|        |
|--------|
| Name   |
| sg1-66 |

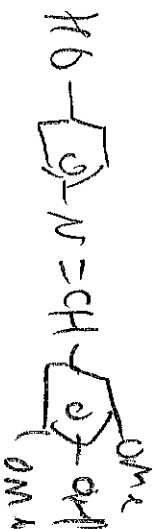

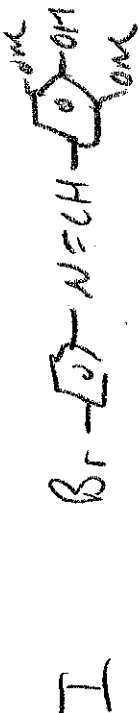

SG1-01a 1 1 "C:\Users\chamake\Desktop\NMR workups"

p-Br-C6H4-N=CH-C6H2 [(3,5-OMe2) (4-OH)]

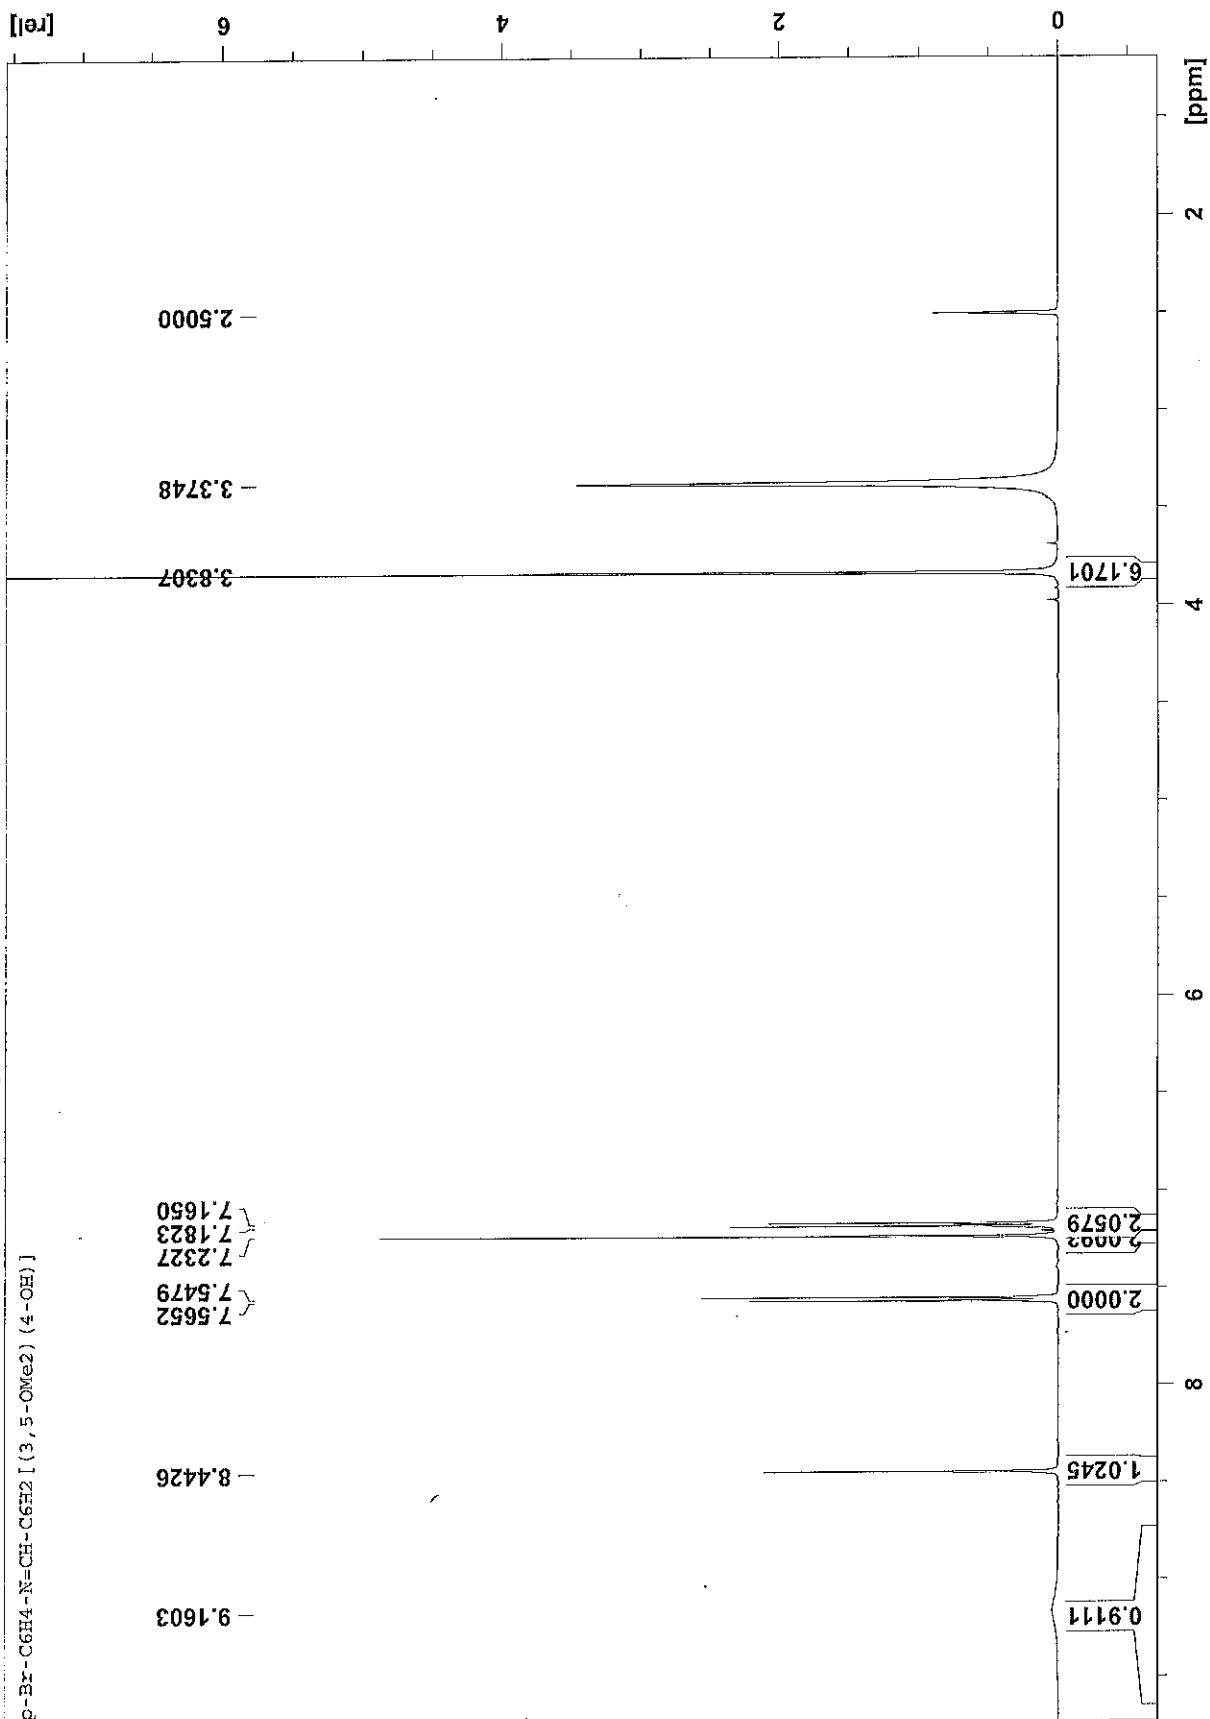

SGI-04 1 1 "C:\Users\chamake\Desktop\NMR workups"

P-MeO-C6H4-N=CH-(3,5-OMe2) (4-OH)

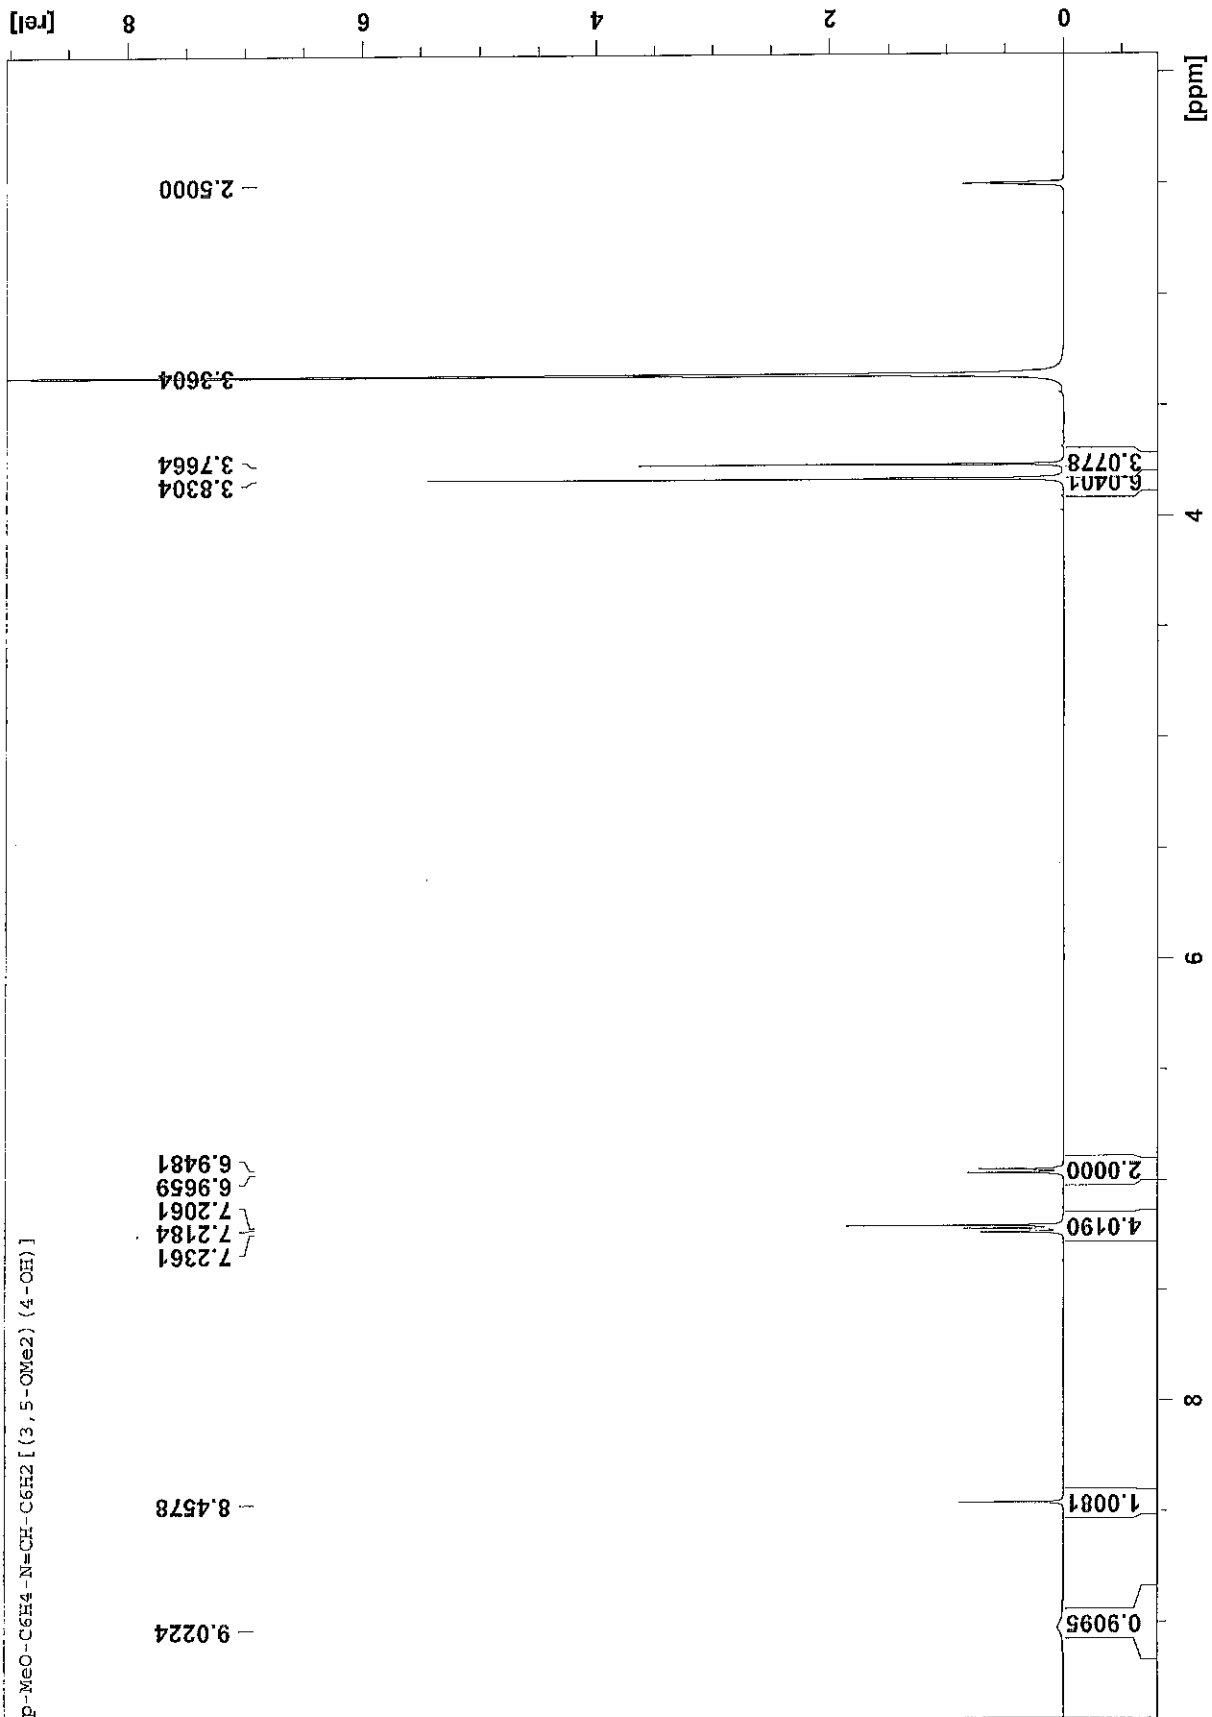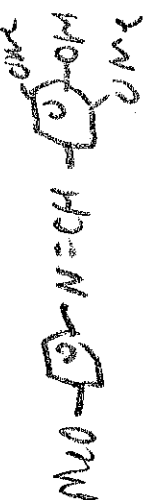

II

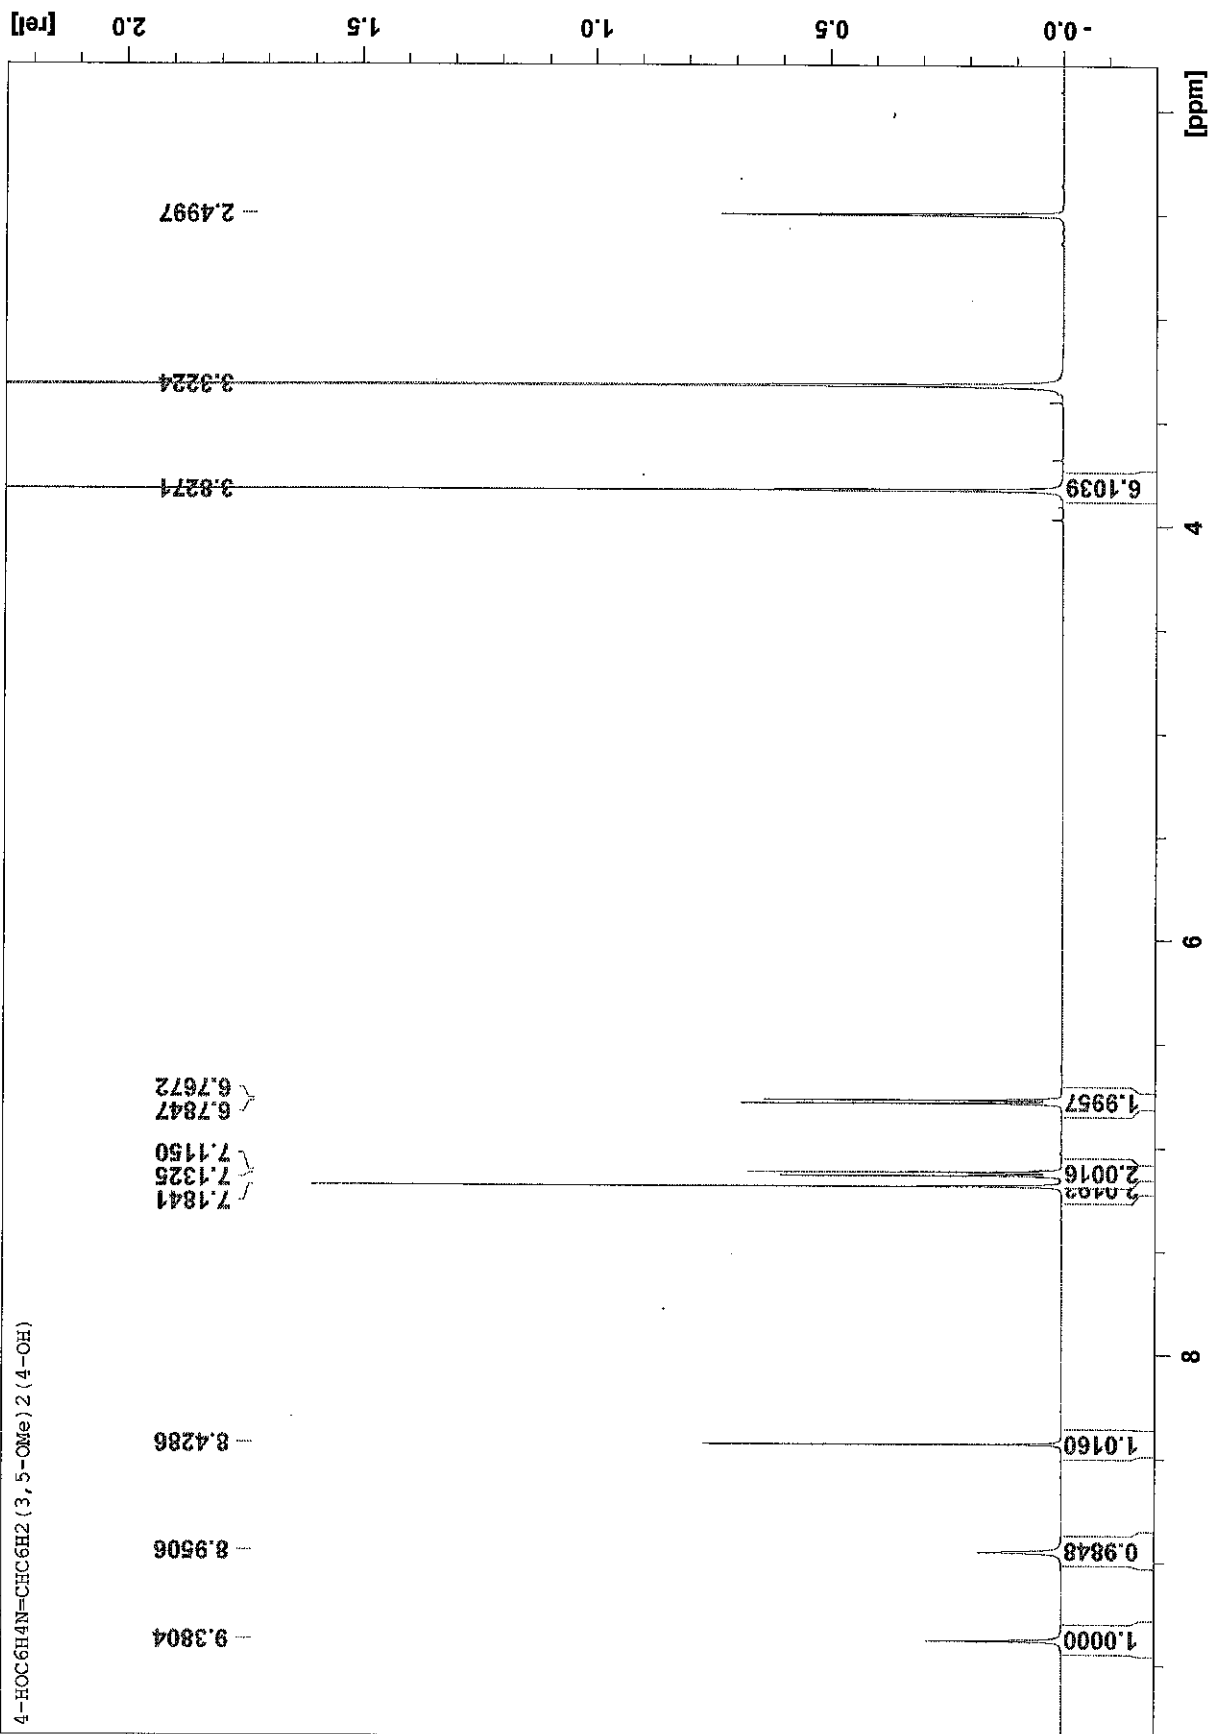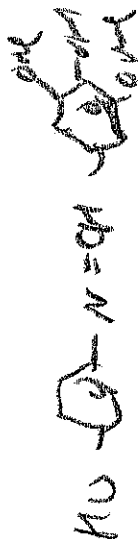

H

# 4-bromo-N-[4-hydroxy-3,5-dimethoxybenzylidene]aniline

WorkSpace 1: SG1-001

~Chromatogram 1 SG1-001

~Spectrum 1 1 - SG1-001 - C1T1

SG1-001 #1 RT: 0.01 AV: 1 NL: 1.56E+007

T: FTMS + p ESI Full ms [300.0000-450.0000]

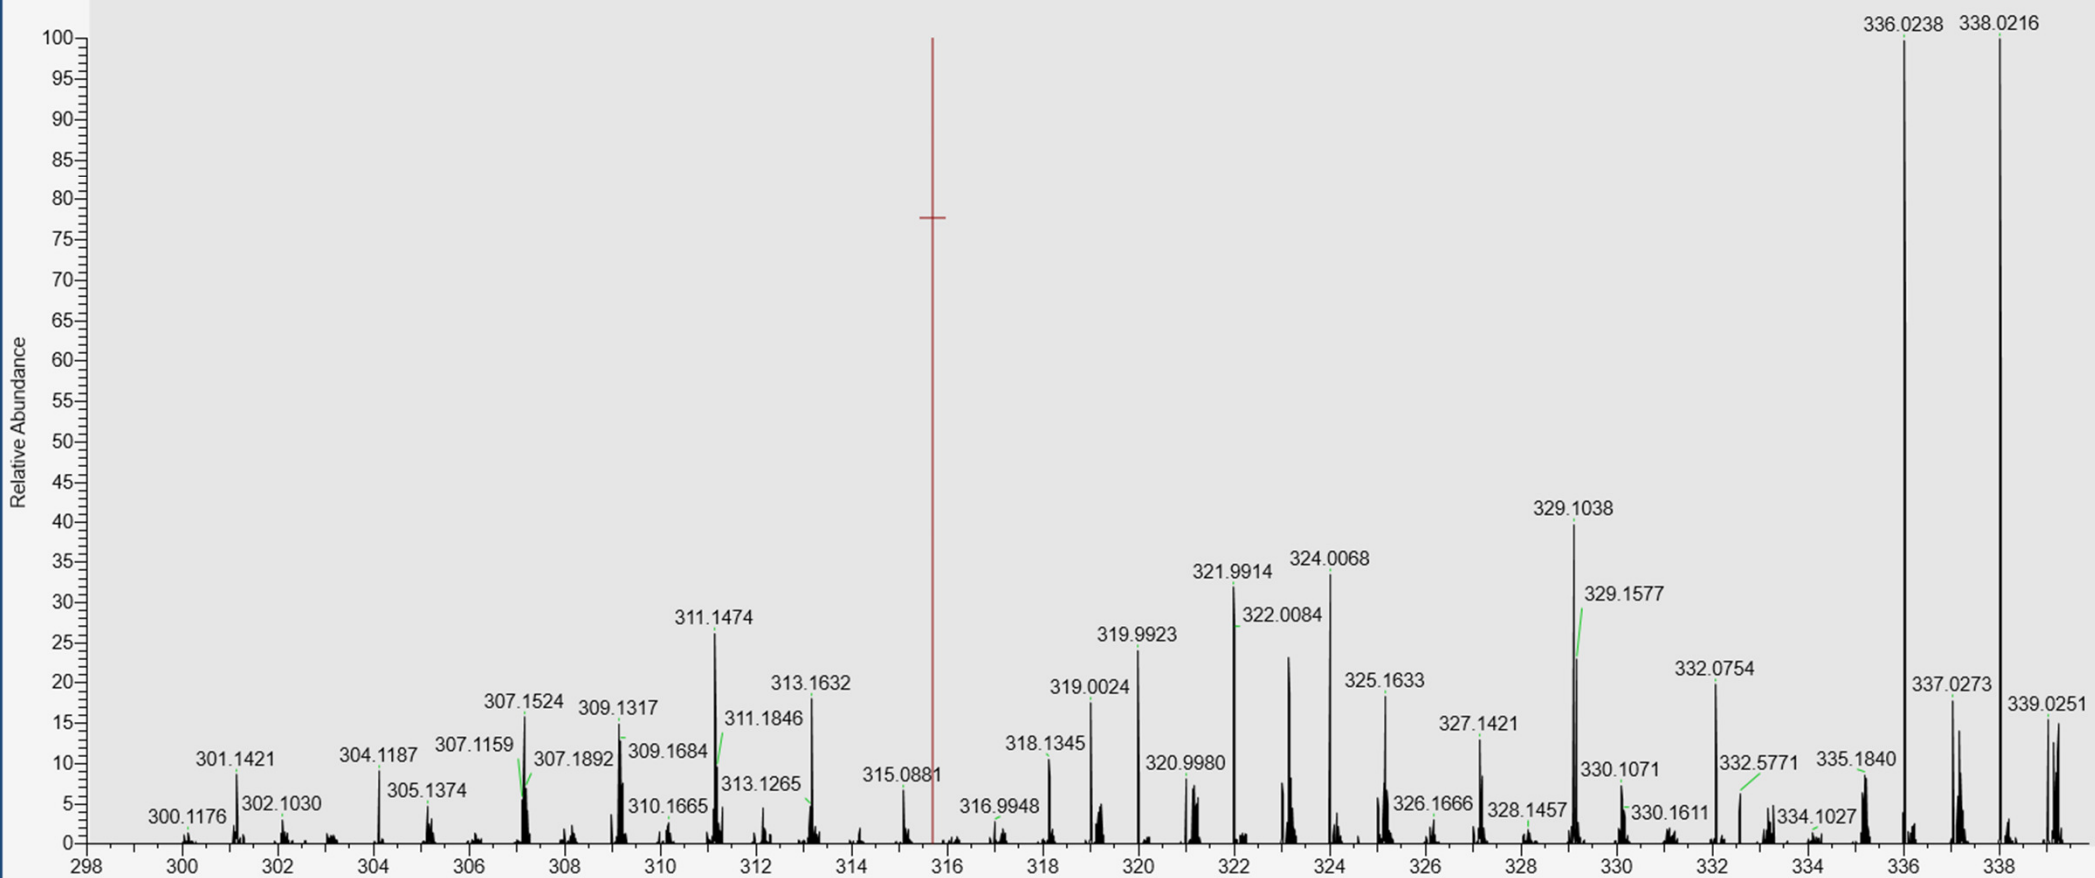

# 4-methoxy-*N*-[4-hydroxy-3,5-dimethoxybenzylidene]aniline

WorkSpace 2: SG1-004

~Chromatogram 1 SG1-004

~Spectrum 1 1 - SG1-004 - C1T1

SG1-004 #1 RT: 0.01 AV: 1 NL: 2.20E+007

T: FTMS + p ESI Full ms [281.0000-350.0000]

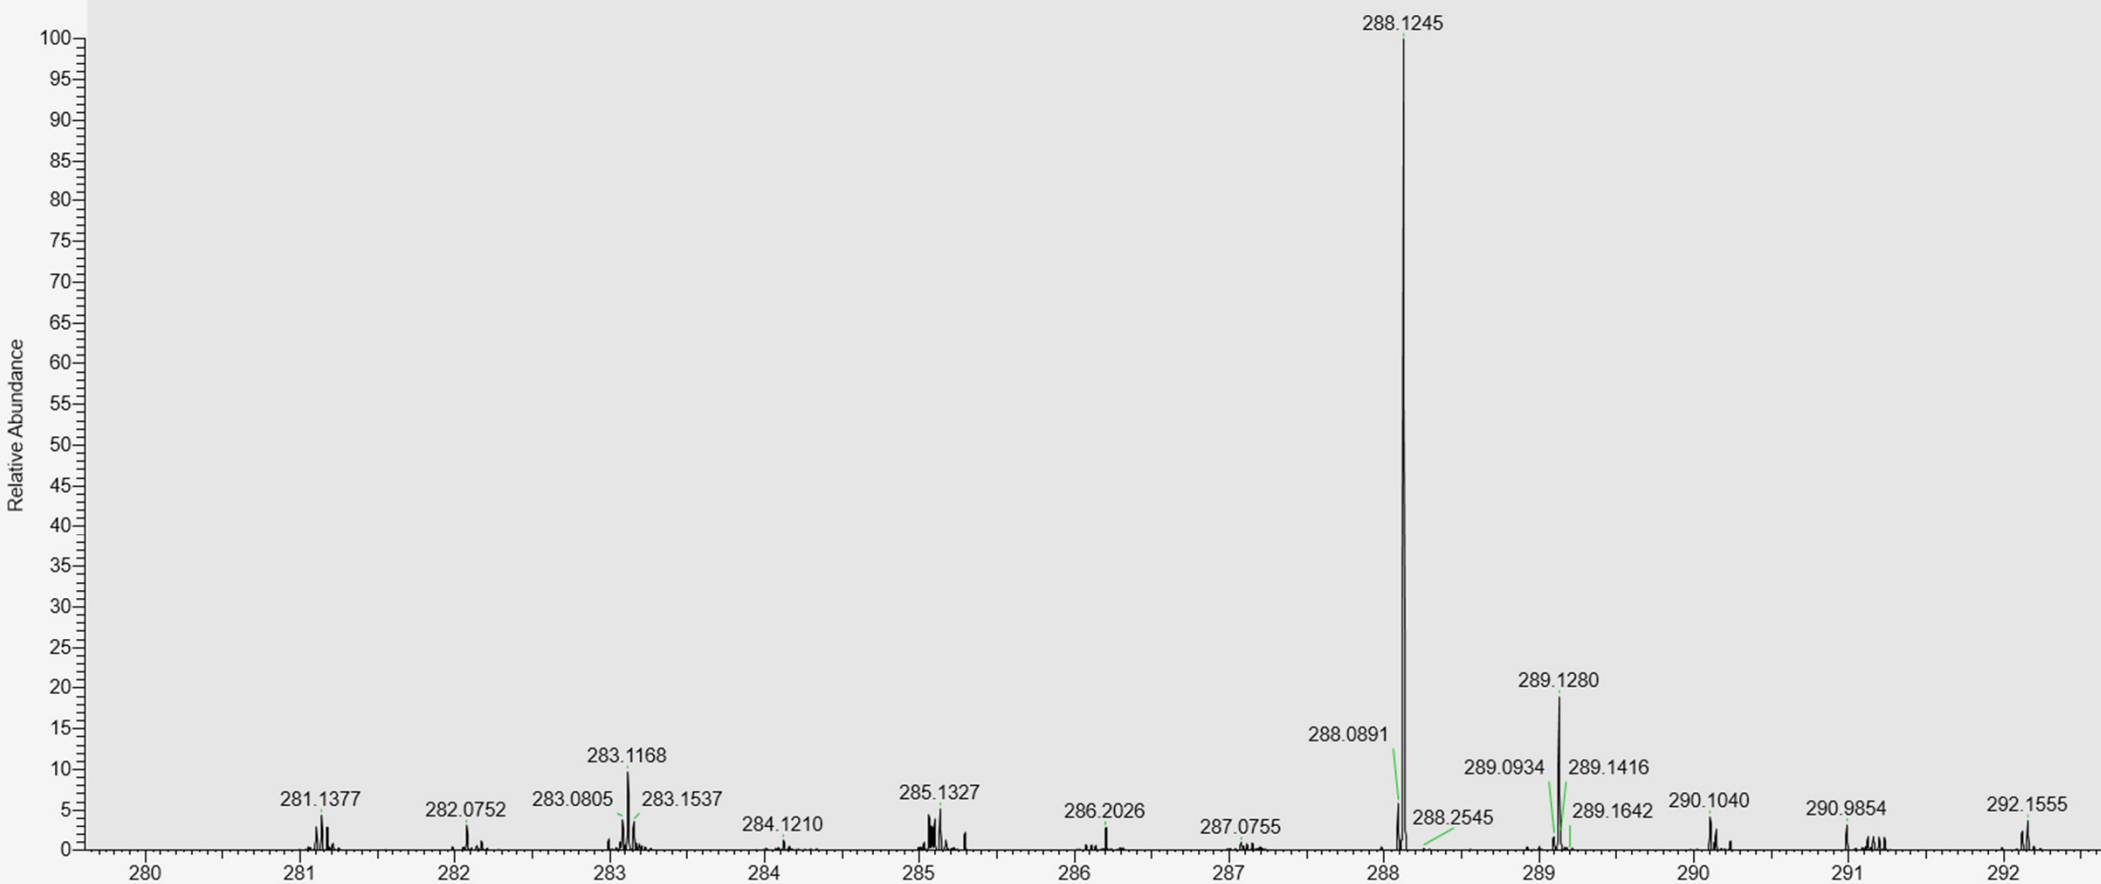



# 4-hydroxy-N-[4-hydroxy-3,5-dimethoxybenzylidene]aniline

WorkSpace 3: SG1-066

~Chromatogram 1 SG1-066

~Spectrum 1 1 - SG1-066 - C1T1

SG1-066 #1 RT: 0.01 AV: 1 NL: 1.21E+005  
T: FTMS + p ESI Full ms [250.0000-318.0000]

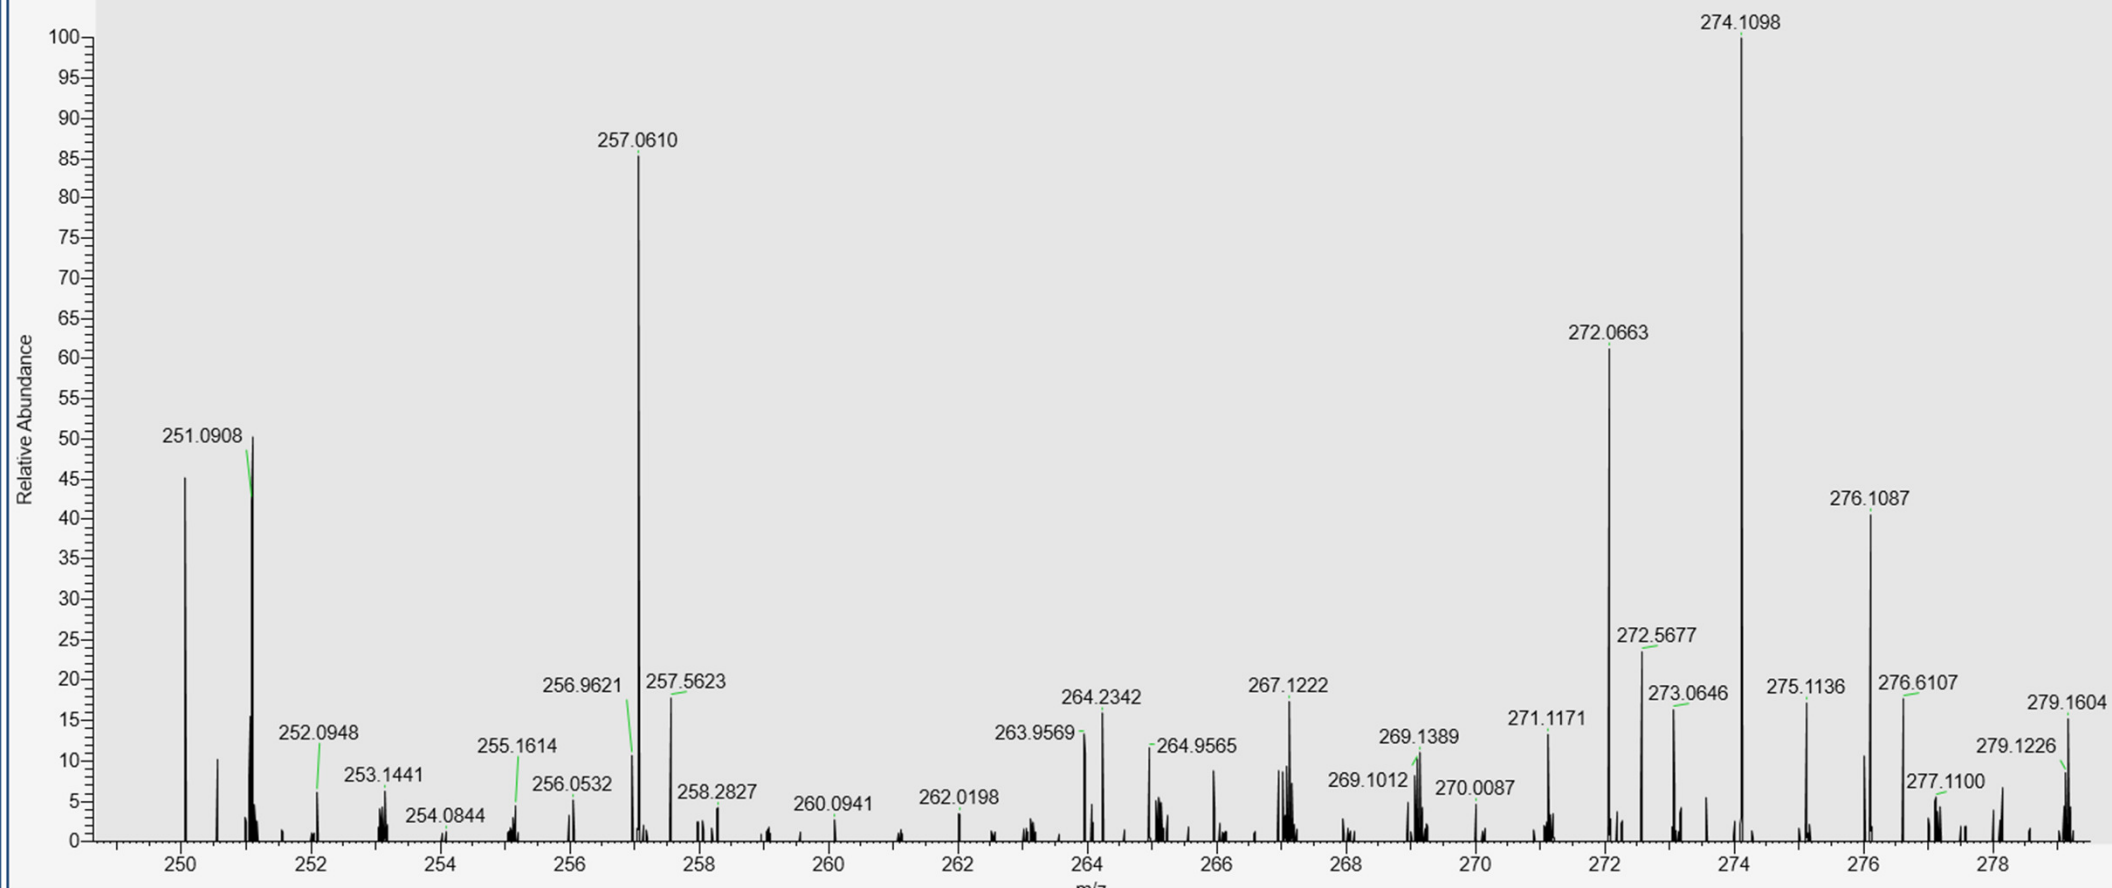

Supplement: s1 [file s1]
